# Supplementary material for: Epidemiological Characteristics and Space-Time Analysis of the 2015 Dengue Outbreak in the Metropolitan Region of Tainan City, Taiwan
Source: PubMed Central journal article supplement (PMC5876941; doi:10.3390/ijerph15030396), 2018-02-26
Supplement: ijerph-15-00396-s001.pdf [file ijerph-15-00396-s001.pdf]

## Supplementary Materials

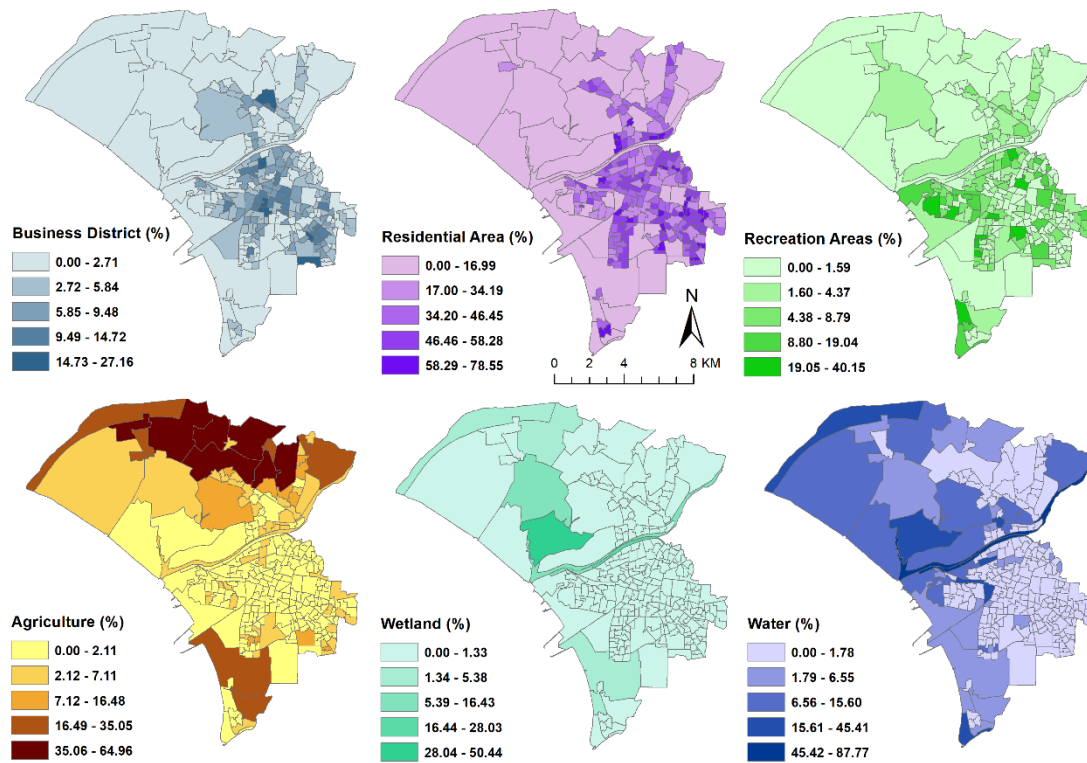

Figure S1. LCLU percentages within the 2<sup>nd</sup> level dissemination area in the metropolitan region of Tainan City.

Table S1. The selected LCLU types in the analysis

| LCLU Types               | Mean (%) <sup>§</sup> | Maximum (%) | Minimum (%) | VIF* |
|--------------------------|-----------------------|-------------|-------------|------|
| Business district        | 4.46                  | 27.16       | 0           | 1.14 |
| Agriculture <sup>#</sup> | 0.78                  | 31.03       | 0           | 1.47 |
| Residential area         | 37.83                 | 78.55       | 0           | 1.97 |
| Recreation area          | 3.85                  | 40.15       | 0           | 1.25 |
| Wetland                  | 0.58                  | 50.44       | 0           | 1.45 |
| Water                    | 2.97                  | 87.77       | 0           | 1.65 |

§: The mean/ maximum/ minimum percentages of LCLU within the 2<sup>nd</sup> level dissemination area in the metropolitan region of Tainan City.

# Agriculture includes rice farms, orchards, and drought-tolerant crops

\* variance inflation factor
